# Supplementary material
Source: publisher figshare collection journal article supplement (https://diabetesjournals.figshare.com/ndownloader/files/33911990)
Supplement: Supplementary file 1 [file 33911990]

Online-Only Supplemental Material

Supplement Table S1. Diabetes medications used to determine filled prescription for a diabetes medication

Supplement Table S2. Interaction of statin use and race/ethnicity in the association between latent TB infection and incident diabetes mellitus

Supplement Table S3. Hazard rate of incident diabetes mellitus comparing US veterans with and without latent TB infection with continuum of care

Supplement Table S4. Supplement Table 4. Sensitivity analysis comparing diabetes incidence among Veterans with any latent TB test to Veterans who did not receive a latent TB test, N=2,952,273

Supplement Table S1. Diabetes medications used to determine filled prescription for a diabetes medication

| Treatment Group                                          | VA Pharmacy Drug Class                                                                                                             | Class                        | Medication names                                                                                              |
|----------------------------------------------------------|------------------------------------------------------------------------------------------------------------------------------------|------------------------------|---------------------------------------------------------------------------------------------------------------|
| <b>1. Non-insulin</b>                                    | "ORAL HYPOGLYCEMIC AGENTS, ORAL" (HS502)                                                                                           | Biguanides                   | Metformin                                                                                                     |
|                                                          |                                                                                                                                    | Sulfonylureas                | Glipizide, Glyburide, Glimepiride, Chlorpropamide, Tolazamide, Tolbutamide                                    |
|                                                          |                                                                                                                                    | Meglitinides                 | Nateglinide, Repaglinide                                                                                      |
|                                                          |                                                                                                                                    | Thiazolidinediones           | Rosiglitazone, Pioglitazone                                                                                   |
|                                                          |                                                                                                                                    | Alpha glucosidase inhibitors | Acarbose                                                                                                      |
|                                                          |                                                                                                                                    | DPP-IV inhibitors            | Sitagliptin, Saxagliptin, Linagliptin, Alogliptin                                                             |
|                                                          |                                                                                                                                    | SGLT-2 inhibitors            | Canagliflozin, Empagliflozin, Dapagliflozin, Ertugliflozin                                                    |
|                                                          | "BLOOD GLUCOSE REGULATION AGENTS" (HS500) (Exenatide); "HYPOGLYCEMIC AGENTS, OTHER"; (HS509) (GLP-1 agonists other than exenatide) | GLP-1 receptor agonists      | Exenatide (Byetta), Exenatide ER (Bydureon), Lixisenatide, Liraglutide, Albiglutide, Dulaglutide, Semaglutide |
|                                                          |                                                                                                                                    | Amylin analog                | Pramlintide                                                                                                   |
| <b>2. Basal insulin +/- non-insulin agents</b>           | HS501 (insulins)                                                                                                                   | Basal insulin                | Glargine, Detemir, Degludec, NPH                                                                              |
| <b>3. Basal and bolus insulin +/- non-insulin agents</b> | HS501 (insulins)                                                                                                                   | Basal insulin                | Glargine, Detemir, Degludec, NPH                                                                              |
|                                                          |                                                                                                                                    | Short-acting insulin         | Aspart, Lispro, Glulisine, Regular                                                                            |
|                                                          |                                                                                                                                    | OR                           |                                                                                                               |
|                                                          |                                                                                                                                    | Pre-mixed insulin and other  | 70/30 insulin, 75/25 insulin, Regular, concentrated U-500                                                     |

Supplement Table S2. Interaction of statin use and race/ethnicity in the association between latent TB infection and incident diabetes mellitus

| Interaction covariate                                                                                                                                                                                                                                                                                                                              | Latent TB infection | Incidence difference*<br>(95%CI) | HR (95%CI)     |
|----------------------------------------------------------------------------------------------------------------------------------------------------------------------------------------------------------------------------------------------------------------------------------------------------------------------------------------------------|---------------------|----------------------------------|----------------|
| Statin                                                                                                                                                                                                                                                                                                                                             |                     |                                  |                |
| Statin use <sup>†</sup>                                                                                                                                                                                                                                                                                                                            | Positive            | 373 (244, 502)                   | 1.3 (1.2-1.4)  |
|                                                                                                                                                                                                                                                                                                                                                    | Negative            | REF                              | REF            |
| No statin use                                                                                                                                                                                                                                                                                                                                      | Positive            | 270 (223, 316)                   | 1.5 (1.4, 1.6) |
|                                                                                                                                                                                                                                                                                                                                                    | Negative            | REF                              | REF            |
| Race/ethnicity                                                                                                                                                                                                                                                                                                                                     |                     |                                  |                |
| White                                                                                                                                                                                                                                                                                                                                              | Positive            | 192 (118, 267)                   | 1.2 (1.1, 1.3) |
|                                                                                                                                                                                                                                                                                                                                                    | Negative            | REF                              | REF            |
| Black                                                                                                                                                                                                                                                                                                                                              | Positive            | 246 (161, 332)                   | 1.2 (1.1, 1.3) |
|                                                                                                                                                                                                                                                                                                                                                    | Negative            | REF                              | REF            |
| Asian                                                                                                                                                                                                                                                                                                                                              | Positive            | 14 (-300, 331)                   | 1.0 (0.7, 1.5) |
|                                                                                                                                                                                                                                                                                                                                                    | Negative            | REF                              | REF            |
| Other                                                                                                                                                                                                                                                                                                                                              | Positive            | 37 (-332, 406)                   | 1.0 (0.7, 1.5) |
|                                                                                                                                                                                                                                                                                                                                                    | Negative            | REF                              | REF            |
| *per 100,000 person-years; † Statin use was evaluated for interaction due to its demonstrated interaction between latent TB infection and diabetes with statins and due to previous mouse model studies that demonstrated statins are associated with reduced <i>M. tuberculosis</i> bacillary load in both early and late phases of TB infection. |                     |                                  |                |

Supplement Table S3. Hazard rate of incident diabetes mellitus comparing US veterans with and without latent TB infection with continuum of care

|                                                                                                                                                                                                                                                                                                                                                                                                                                                                                                                                                                                                                                                        | <b>Diabetes incidence<br/>N/Total (%)</b> | <b>Incidence<br/>Per 100,000<br/>PY</b> | <b>Hazard ratio*<br/>(95%CI)</b> | <b>Adjusted hazard<br/>ratio** (95%CI)</b> |
|--------------------------------------------------------------------------------------------------------------------------------------------------------------------------------------------------------------------------------------------------------------------------------------------------------------------------------------------------------------------------------------------------------------------------------------------------------------------------------------------------------------------------------------------------------------------------------------------------------------------------------------------------------|-------------------------------------------|-----------------------------------------|----------------------------------|--------------------------------------------|
| <b>Continuum of care before latent TB testing, N=183,470<sup>†</sup></b>                                                                                                                                                                                                                                                                                                                                                                                                                                                                                                                                                                               |                                           |                                         |                                  |                                            |
| <b>Latent TB infection<sup>‡</sup></b>                                                                                                                                                                                                                                                                                                                                                                                                                                                                                                                                                                                                                 |                                           |                                         |                                  |                                            |
| IGRA/TST positive                                                                                                                                                                                                                                                                                                                                                                                                                                                                                                                                                                                                                                      | 581/11,525 (5.0%)                         | 1,201                                   | 1.3 (1.1, 1.4)                   | 1.1 (1.0, 1.2)                             |
| IGRA/TST negative                                                                                                                                                                                                                                                                                                                                                                                                                                                                                                                                                                                                                                      | 5,720/171,945 (3.3%)                      | 943                                     | REF                              | REF                                        |
| <b>Continuum of care after latent TB testing, N=199,846<sup>#</sup></b>                                                                                                                                                                                                                                                                                                                                                                                                                                                                                                                                                                                |                                           |                                         |                                  |                                            |
| <b>Latent TB infection<sup>‡</sup></b>                                                                                                                                                                                                                                                                                                                                                                                                                                                                                                                                                                                                                 |                                           |                                         |                                  |                                            |
| IGRA/TST positive                                                                                                                                                                                                                                                                                                                                                                                                                                                                                                                                                                                                                                      | 1,183/14,463 (8.2%)                       | 774                                     | 1.2 (1.1-1.3)                    | 1.1 (1.0,1.2)                              |
| IGRA/TST negative                                                                                                                                                                                                                                                                                                                                                                                                                                                                                                                                                                                                                                      | 10,859/185,383 (5.9%)                     | 759                                     | REF                              | REF                                        |
| *Either IGRA or TST positive; and either IGRA/TST negative with no positive LTBI test; *Adjusted for age and sex; **Adjusted for age, sex, BMI, race, region, smoking status, HIV, hepatitis C, hepatitis B, hypertension, cholesterol, statin use; <sup>†</sup> Among patients with ≥1 primary care visit per year for 2 consecutive years before LTBI testing and who received either a hemoglobin A1c or glucose measurement during that interval; <sup>#</sup> Among Veterans with ≥1 primary care visit per year for 3 consecutive years after LTIB testing and who received either a hemoglobin A1c or glucose measurement during that interval. |                                           |                                         |                                  |                                            |

Supplement Table 4. Sensitivity analysis comparing diabetes incidence among Veterans with any latent TB test to Veterans who did not receive a latent TB test, N=2,952,273

|                                     | <b>Total</b> | <b>Prevalent diabetes at index date</b> | <b>Cumulative diabetes incidence</b> | <b>Incidence rate (per 100,000 PY)</b> |
|-------------------------------------|--------------|-----------------------------------------|--------------------------------------|----------------------------------------|
| Any LTBI test                       | N=739,572    | 156,310 (21.2%)                         | 19,408 (3.4%)                        | 781                                    |
| Controls without LTBI test          | N=2,212,701  | 332,368 (15.0%)                         | 87,463 (3.9%)                        | 794                                    |
| LTBI: Latent tuberculosis infection |              |                                         |                                      |                                        |

Supplement Table 4 Notes: Three controls without a latent TB test (n=2,212,701) were selected at random for each Veteran with a latent TB test (those n=739,572 included in our primary analysis). Controls were matched by sex, year of birth, and by race/ethnicity and were required to have the same eligibility criteria as Veterans who were tested for latent TB (enrollment in care between 2000-2015 and exclusion of Veterans with HIV or previous history of active TB). Diabetes prevalence and diabetes incidence were defined using the same diabetes definition in the primary analysis: a filled prescription for a diabetes medication in combination with use of a diabetes ICD-9 code (in conjunction with one face-to-face outpatient primary care visit or any two uses of the code 250.xx). For those with a TST/IGRA result, date of receiving the latent TB test was the index date for comparison with controls.
